# Supplementary material
Source: PubMed Central journal article supplement (PMC7871851)
Supplement: mmc1.pdf [file mmc1.pdf]

## **Supplemental information**

### **Seasonal human coronavirus antibodies are boosted upon SARS-CoV-2 infection but not associated with protection**

**Elizabeth M. Anderson, Eileen C. Goodwin, Anurag Verma, Claudia P. Arevalo, Marcus J. Bolton, Madison E. Weirick, Sigrid Gouma, Christopher M. McAllister, Shannon R. Christensen, JoEllen Weaver, Philip Hicks, Tomaz B. Manzoni, Oluwatosin Oniyide, Holly Ramage, Divij Mathew, Amy E. Baxter, Derek A. Oldridge, Allison R. Greenplate, Jennifer E. Wu, Cécile Alanio, Kurt D'Andrea, Oliva Kuthuru, Jeanette Dougherty, Ajinkya Pattekar, Justin Kim, Nicholas Han, Sokratis A. Apostolidis, Alex C. Huang, Laura A. Vella, Leticia Kuri-Cervantes, M. Betina Pampena, The UPenn COVID Processing Unit, Michael R. Betts, E. John Wherry, Nuala J. Meyer, Sara Cherry, Paul Bates, Daniel J. Rader, and Scott E. Hensley**

**Table S1:** Comparison between antibody titers and COVID-19 phenotypes, related to Figure 2.

| <b>Phenotype Name</b>           | <b>Antibody Titers</b> | <b>Beta</b> | <b>SE</b> | <b>P</b> | <b>Cases</b> | <b>Controls</b> |
|---------------------------------|------------------------|-------------|-----------|----------|--------------|-----------------|
| SARS-CoV-2 Susceptibility       | N titer                | 9E-05       | 1E-04     | 0.47     | 251          | 251             |
| SARS-CoV-2 Susceptibility       | Spike-FL Titer         | -1E-04      | 3E-04     | 0.65     | 251          | 251             |
| SARS-CoV-2 Susceptibility       | Spike-RBD Titer        | 5E-04       | 9E-04     | 0.53     | 251          | 251             |
| SARS-CoV-2 Susceptibility       | OC43 Spike Titer       | 1E-06       | 2E-05     | 0.93     | 251          | 251             |
| COVID-19 Hospitalization        | N Titer                | 1E-04       | 1E-04     | 0.40     | 80           | 171             |
| COVID-19 Hospitalization        | Spike-FL Titer         | -5E-04      | 1E-03     | 0.61     | 80           | 171             |
| COVID-19 Hospitalization        | Spike-RBD Titer        | -2E-03      | 1E-01     | 0.99     | 80           | 171             |
| COVID-19 Hospitalization        | OC43 Spike Titer       | 1E-05       | 3E-05     | 0.62     | 80           | 171             |
| COVID-19 Severe Hospitalization | N Titer                | -5E-04      | 1E-03     | 0.70     | 24           | 171             |
| COVID-19 Severe Hospitalization | Spike-FL Titer         | -1E-04      | 8E-04     | 0.88     | 24           | 171             |
| COVID-19 Severe Hospitalization | Spike-RBD Titer        | -2E-03      | 2E-01     | 0.99     | 24           | 171             |
| COVID-19 Severe Hospitalization | OC43 Spike Titer       | 2E-05       | 5E-05     | 0.74     | 24           | 171             |

**Table S2:** Phenotype definitions related to Table S1, related to Figure 2.

| <b>Phenotype Name</b>           | <b>Case Definition</b>                                                                                                         | <b>Control Definition</b>                                                                          | <b>Case</b> | <b>Controls</b> |
|---------------------------------|--------------------------------------------------------------------------------------------------------------------------------|----------------------------------------------------------------------------------------------------|-------------|-----------------|
| SARS-CoV-2 Susceptibility       | RT-PCR confirmed <i>positive</i> test for SARS-CoV2 infection                                                                  | RT-PCR confirmed <i>negative</i> test for SARS-CoV2 infection                                      | 251         | 251             |
| COVID-19 Hospitalization        | RT-PCR confirmed positive test for SARS-CoV2 infection and <i>hospitalized</i> due to COVID-19                                 | RT-PCR confirmed positive test for SARS-CoV2 infection and <i>not hospitalized</i> due to COVID-19 | 80          | 171             |
| COVID-19 Severe Hospitalization | RT-PCR confirmed positive test for SARS-CoV2 infection and <i>required respiratory support or had ICU stay</i> due to COVID-19 | RT-PCR confirmed positive test for SARS-CoV2 infection and <i>not hospitalized</i> due to COVID-19 | 24          | 171             |
